# Supplementary material for: Cost Drivers and Financial Burden for Cancer-Affected Families in China: A Systematic Review
Source: MDPI journal article supplement (doi:10.3390/curroncol30080555), 2023-08-16
Supplement: s1 [file s1]

## Supplementary Tables

Table S1. Search strategy

Table S2. Ten criteria for quality assessment of the included quantitative studies

Table S3. Patient costs calculated by observations

Table S4. Annual medical costs by subgroups from a multi-center patient survey (four studies), mean US\$ (n)

Table S5. Non-medical costs for cancer treatment from 12 patient surveys

Table S6. Medical and non-medical costs from seven studies, mean and percentage of total annual direct costs

Table S7. Indirect costs for cancer treatment from seven studies

Table S8. Annual direct cost as a percentage of annual household income from six studies and meta-proportion of five studies, %

Table S9. Catastrophic health expenditure (CHE) incurred by cancer care from nine studies

**Table S1. Search strategy**

| Database       | Query                                                                                                                                                                                                                                                                                                                                                                                                                                                                                                                                                                                                                                                                                                                                                                                                                                                                                                                                                                                                                                                                                               | First round search <sup>a</sup> | Updated search <sup>b</sup> |
|----------------|-----------------------------------------------------------------------------------------------------------------------------------------------------------------------------------------------------------------------------------------------------------------------------------------------------------------------------------------------------------------------------------------------------------------------------------------------------------------------------------------------------------------------------------------------------------------------------------------------------------------------------------------------------------------------------------------------------------------------------------------------------------------------------------------------------------------------------------------------------------------------------------------------------------------------------------------------------------------------------------------------------------------------------------------------------------------------------------------------------|---------------------------------|-----------------------------|
| Pubmed         | ((((((((cancer) OR (tumor)) OR (malignancy)) OR (neoplasm)) OR (carcinoma)) OR (oncology)) OR (Metastatic)) AND (((((((cost[Title/Abstract]) OR (expenditure[Title/Abstract])) OR (expense[Title/Abstract])) OR (burden[Title/Abstract])) OR (payment[Title/Abstract])) OR (((cost[MeSH Terms]) OR (expenditure[MeSH Terms])) OR (payment[MeSH Terms])) OR (spending[Title/Abstract])) OR (spending[MeSH Terms])) OR ((financial[Title/Abstract]) OR (financial[MeSH Terms])) OR ((insurance) OR ("social protection")))) AND ((China[Title/Abstract]) OR (Chinese[Title/Abstract]))                                                                                                                                                                                                                                                                                                                                                                                                                                                                                                                | 3686                            | 793                         |
| Embase         | #1 'cancer'/exp OR 'cancer' OR 'cancer'/exp OR cancer OR 'tumor'/exp OR 'tumor' OR 'tumor'/exp OR tumor OR 'malignancy'/exp OR 'malignancy' OR 'malignancy'/exp OR malignancy OR 'neoplasm'/exp OR 'neoplasm' OR 'neoplasm'/exp OR neoplasm OR 'carcinoma'/exp OR 'carcinoma' OR 'carcinoma'/exp OR carcinoma OR 'oncology'/exp OR 'oncology' OR 'oncology'/exp OR oncology OR 'metastatic' OR metastatic<br>#2 cost:ti,ab,kw OR expenditure:ti,ab,kw OR expense:ti,ab,kw OR burden:ti,ab,kw OR payment:ti,ab,kw OR spending:ti,ab,kw OR 'cost'/exp OR expenditure OR expense OR 'burden'/exp OR payment OR spending OR financial:ti,ab,kw OR 'financial'<br>#3 'insurance'/exp OR 'insurance' OR 'social protection'/exp OR 'social protection'<br>#4 #2 OR #3<br>#5 china:ti,ab,kw OR chinese:ti,ab,kw<br>#6 #1 AND #4 AND #5                                                                                                                                                                                                                                                                     | 5126                            | 999                         |
| Ovid           | #1 financial.mp. or cancer.mp. or exp Neoplasms/ or tumor.mp. or exp Neoplasms/ or exp Surgical Oncology/ or exp Oncology Service, Hospital/ or oncology.mp. or exp Oncology Nursing/ or exp Psycho-Oncology/ or exp Medical Oncology/ or exp Integrative Oncology/ or exp Radiation Oncology/ or metastatic.mp. or neoplasm.mp. or exp Neoplasms/<br>#2 cost.mp. or expenditure.mp. or expense.mp. or burden.mp. or health care costs/ or health expenditures/ or economics, hospital/ or economics, medical/ or economics, nursing/ or economics, pharmaceutical/ or exp Health Expenditures/ or spending.mp. or exp Health Care Costs/ or exp health care costs/ or exp health expenditures/ or exp economics, hospital/ or exp economics, medical/ or exp economics, nursing/ or exp economics, pharmaceutical/ or exp Health Care Costs/ or payment.mp. or exp Insurance, Health, Reimbursement/ or insurance.mp. or exp Insurance/ or 'social protection'.mp. or Financial Stress/ or financial.mp. or Financial Support/<br>#3 China.mp. or exp China/ or Chinese.mp.<br>#4 #1 and #2 and #3 | 2814                            | 269                         |
| Web of Science | #1 (((((((((ALL=(cancer*)) OR ALL=(cancer)) OR ALL=(tumor)) OR ALL=(tumor*)) OR ALL=(neurofibroma)) OR ALL=(neoplasm*)) OR ALL=(carcinoma)) OR ALL=(carcinoma*)) OR ALL=(oncology)) OR ALL=(metastatic*)) OR ALL=(metastat*))                                                                                                                                                                                                                                                                                                                                                                                                                                                                                                                                                                                                                                                                                                                                                                                                                                                                       | 6528                            | 833                         |

| Database     | Query                                                                                                                                                                                                                                                                                                                                                                                                                                                                                                                                                                                                                                                                                                                                                                                                                                                                                                                                                                                                                                                     | First round search <sup>a</sup> | Updated search <sup>b</sup> |
|--------------|-----------------------------------------------------------------------------------------------------------------------------------------------------------------------------------------------------------------------------------------------------------------------------------------------------------------------------------------------------------------------------------------------------------------------------------------------------------------------------------------------------------------------------------------------------------------------------------------------------------------------------------------------------------------------------------------------------------------------------------------------------------------------------------------------------------------------------------------------------------------------------------------------------------------------------------------------------------------------------------------------------------------------------------------------------------|---------------------------------|-----------------------------|
|              | #2 ((((((((((((((TI=(cost)) OR TI=(cost*)) OR TI=(expenditure))) OR TI=(expenditure*)) OR TI=(payment)) OR TI=(payment*)) OR TI=(burden)) OR TI=(expense)) OR TI=(spending)) OR TI=(financial)) OR TI=(burden*)) OR TI=(economic)) OR TI=(economic*)) OR TI=(financial)) OR TI=(financial*)) OR ((((((((((((((AK=(cost)) OR AK=(cost*)) OR AK=(expenditure))) OR AK=(expenditure*)) OR AK=(payment)) OR AK=(payment*)) OR AK=(burden)) OR AK=(expense)) OR AK=(spending)) OR AK=(financial)) OR AK=(burden*)) OR AK=(economic)) OR AK=(economic*)) OR AK=(financial)) OR AK=(financial*)) OR ((((((((((((((KP=(cost)) OR KP=(cost*)) OR KP=(expenditure))) OR KP=(expenditure*)) OR KP=(payment)) OR KP=(payment*)) OR KP=(burden)) OR KP=(expense)) OR KP=(spending)) OR KP=(financial)) OR KP=(burden*)) OR KP=(economic)) OR KP=(economic*)) OR KP=(financial)) OR KP=(financial*))<br>#3 ((#2) OR ((ALL=(insurance)) OR ALL=(insure*)) OR ALL=(insura*)) OR ALL=("social protection")<br>#4 (ALL=(China)) OR ALL=(Chinese)<br>#5 ((#1) AND #3) AND #4 |                                 |                             |
| Cochrane     | cancer OR tumor OR malignancy OR neoplasm OR carcinoma OR oncology OR Metastatic in All Text AND cost OR expenditure OR burden OR payment OR spending OR expense in Title Abstract Keyword AND China OR Chinese in Title Abstract Keyword - with Cochrane Library publication date Between Jan 2009 and Oct 2021 (Word variations have been searched)                                                                                                                                                                                                                                                                                                                                                                                                                                                                                                                                                                                                                                                                                                     | 52                              | --                          |
| CNKI         | 主题 (瘤 + 肿瘤 + 癌 + 癌症 + 白血病) AND 篇名 (费用 + 支出 + 负担)                                                                                                                                                                                                                                                                                                                                                                                                                                                                                                                                                                                                                                                                                                                                                                                                                                                                                                                                                                                                          | 941                             | 130                         |
| Wanfang data | 主题:(瘤 OR 癌 OR 白血病) and 题名或关键词:(费用 OR 支出 OR 经济负担)                                                                                                                                                                                                                                                                                                                                                                                                                                                                                                                                                                                                                                                                                                                                                                                                                                                                                                                                                                                                          | 3777                            | 67                          |
| Total        |                                                                                                                                                                                                                                                                                                                                                                                                                                                                                                                                                                                                                                                                                                                                                                                                                                                                                                                                                                                                                                                           | 22924                           | 3091                        |

<sup>a</sup>: Searched studies published between January 1<sup>st</sup> 2009 and October 8<sup>th</sup> 2021.

<sup>b</sup>: Searched studies published between October 11<sup>th</sup> 2021 and August 10<sup>th</sup> 2022.

**Table S2. Ten criteria for quality assessment of the included quantitative studies**

| Criteria                                                |                                                                                                                                                   | Study 1 | Study 2 | .... |
|---------------------------------------------------------|---------------------------------------------------------------------------------------------------------------------------------------------------|---------|---------|------|
| <b>A. General</b>                                       |                                                                                                                                                   |         |         |      |
| 1. Objectives/aims                                      | i. clearly stated;                                                                                                                                |         |         |      |
|                                                         | ii. partially/poorly stated;                                                                                                                      |         |         |      |
|                                                         | iii. not stated                                                                                                                                   |         |         |      |
|                                                         | Explain                                                                                                                                           |         |         |      |
|                                                         | Score                                                                                                                                             |         |         |      |
| <b>B. Methodology and Data Collection</b>               |                                                                                                                                                   |         |         |      |
| 2. Population                                           | i.The eligibility criteria is clear, population is clearly defined;                                                                               |         |         |      |
|                                                         | ii.The eligibility is not clear, polulation is not clearly defined.                                                                               |         |         |      |
|                                                         | Explain                                                                                                                                           |         |         |      |
|                                                         | Score                                                                                                                                             |         |         |      |
| 3. Representativeness and Recruitment of the Population | i.Truly representative of the average in the target population (all subjects or random sampling);                                                 |         |         |      |
|                                                         | ii. Somewhat representative of the average in the target population (non-random sampling);                                                        |         |         |      |
|                                                         | iii. Selected group of users; iv. No description of the sampling strategy or unclear                                                              |         |         |      |
|                                                         | Explain                                                                                                                                           |         |         |      |
|                                                         | Score                                                                                                                                             |         |         |      |
| 4. Sample Size                                          | i. All subjects in the target population ( $n \geq 100$ ) or explanation regarding sample size used (regardless of $n$ );                         |         |         |      |
|                                                         | ii. No explanation regarding sample size used, unsatisfactory size ( $n < 100$ ) or unclear                                                       |         |         |      |
|                                                         | Explain                                                                                                                                           |         |         |      |
|                                                         | Score                                                                                                                                             |         |         |      |
| 5. non-Respondents                                      | i. Comparability between respondent and non-respondent characteristics are established, and the response rate is satisfactory ( $\geq 70\%$ );    |         |         |      |
|                                                         | ii.The response rate is unsatisfactory ( $< 70\%$ ), or the comparability between respondents and non-respondents is unsatisfactory ( $< 70\%$ ); |         |         |      |
|                                                         | iii. No description of the response rate or the characteristics of the responders and the non-responders is unclear                               |         |         |      |
|                                                         | Explain                                                                                                                                           |         |         |      |
|                                                         | Score                                                                                                                                             |         |         |      |
| 6. Data Collection Tool Used                            | i.Description of tool (e.g. questionnaire) and development or source thereof used to assess the outcome(s) is/are defined;                        |         |         |      |
|                                                         | ii.Description of tool (without development or source) used to assess the outcome(s) is/are clearly defined;                                      |         |         |      |
|                                                         | iii.Description of tool and/or development thereof used to assess the outcome(s) is poorly, unclearly or not defined.                             |         |         |      |
|                                                         | Explain                                                                                                                                           |         |         |      |

| Criteria                                           |                                                                                                                                                                                                                                                                                                                                                                                                                                            | Study 1 | Study 2 | .... |
|----------------------------------------------------|--------------------------------------------------------------------------------------------------------------------------------------------------------------------------------------------------------------------------------------------------------------------------------------------------------------------------------------------------------------------------------------------------------------------------------------------|---------|---------|------|
|                                                    | Score                                                                                                                                                                                                                                                                                                                                                                                                                                      |         |         |      |
| 7. Outcome-Related Question(s) and/or Statement(s) | The question(s) and/or statement(s) pertaining to the outcome is/are:<br>i. stated explicitly, clearly, are unambiguous and is/are not phrased with bias towards any particular view;<br>ii. not stated explicitly, clearly or they are ambiguous or is/are phrased with bias towards any particular view                                                                                                                                  |         |         |      |
|                                                    | Explain                                                                                                                                                                                                                                                                                                                                                                                                                                    |         |         |      |
|                                                    | Score                                                                                                                                                                                                                                                                                                                                                                                                                                      |         |         |      |
| 8. Ethical Considerations                          | i. Informed consent was obtained from participants and ethical approval of study was obtained (if applicable);<br>ii. Unclear/not reported if informed consent was obtained from participants or unclear/not reported if ethical approval was obtained (if applicable);<br>iii. Unclear/not reported if informed consent was obtained from participants AND unclear/not reported if ethical approval of study was obtained (if applicable) |         |         |      |
|                                                    | Explain                                                                                                                                                                                                                                                                                                                                                                                                                                    |         |         |      |
|                                                    | Score                                                                                                                                                                                                                                                                                                                                                                                                                                      |         |         |      |
| <b>C. Data Presentation and Analysis</b>           |                                                                                                                                                                                                                                                                                                                                                                                                                                            |         |         |      |
| 9. Clarity                                         | i. Data is presented with utmost clarity including numerators, denominators and missing data;<br>ii. At least some data is unclear requiring guesswork or leaving questions unanswered                                                                                                                                                                                                                                                     |         |         |      |
|                                                    | Explain                                                                                                                                                                                                                                                                                                                                                                                                                                    |         |         |      |
|                                                    | Score                                                                                                                                                                                                                                                                                                                                                                                                                                      |         |         |      |
| 10. Consistency                                    | i. There is consistency between the research question, data available and reporting of data;<br>ii. At least some inconsistencies exist between the research question, data available and reporting of the data                                                                                                                                                                                                                            |         |         |      |
|                                                    | Explain                                                                                                                                                                                                                                                                                                                                                                                                                                    |         |         |      |
|                                                    | Score                                                                                                                                                                                                                                                                                                                                                                                                                                      |         |         |      |
| <b>Overall quality assessment</b>                  |                                                                                                                                                                                                                                                                                                                                                                                                                                            |         |         |      |
| High, Medium, Low                                  |                                                                                                                                                                                                                                                                                                                                                                                                                                            |         |         |      |
| Explain                                            |                                                                                                                                                                                                                                                                                                                                                                                                                                            |         |         |      |
| Score                                              |                                                                                                                                                                                                                                                                                                                                                                                                                                            |         |         |      |

**Table S3. Patient costs calculated by observations**

| Cost category                                                                                                                   | Total Medical costs                            |                                                 |                                               | Inpatient costs                           | Outpatient costs                          | Non-medical costs                            | Direct costs                                   | Indirect costs                               | Overall costs                                    |
|---------------------------------------------------------------------------------------------------------------------------------|------------------------------------------------|-------------------------------------------------|-----------------------------------------------|-------------------------------------------|-------------------------------------------|----------------------------------------------|------------------------------------------------|----------------------------------------------|--------------------------------------------------|
| Annual cost                                                                                                                     | 15 studies<br>(21<br>observations)             | 12 studies <sup>a</sup><br>(18<br>observations) | 3 studies <sup>b</sup><br>(3<br>observations) | 12 studies<br>(33<br>observations)        | 5 studies<br>(5<br>observations)          | 8 studies<br>(8<br>observations)             | 7 studies<br>(7<br>observations)               | 3 studies<br>(7<br>observations)             | 2 studies<br>(2<br>observations)                 |
| Unweighted average of mean costs (SD, range)                                                                                    | 5138.91<br>[3410.38]<br>[1801.88,<br>14683.58] | 4529.76<br>[3177.17]<br>[1801.88,<br>14683.58]  | 8793.80<br>[1177.8]<br>[7420.85,<br>10297.02] | 3145.52[1431.99]<br>[1369.46,<br>8647.46] | 625.52<br>[305.79]<br>[114.55,<br>865.35] | 1486.17<br>[1425.17]<br>[687.84,<br>4977.83] | 7460.69<br>[3201.78]<br>[4903.09,<br>12398.68] | 1893.52<br>[3573.36]<br>[380.33,<br>9978.13] | 14305.74<br>[11414.23]<br>[6234.66,<br>22376.81] |
| Median (IQR) of mean costs                                                                                                      | 4105.94<br>[2365.39,<br>5619.88]               | 3947.25<br>[2353.63,<br>5257.95]                | 8663.51<br>[8042.18,<br>9480.27]              | 2843.23<br>[2376.00,<br>3642.42]          | 772.07<br>[573.39,<br>802.24]             | 1005.14<br>[887.14,<br>1219.58]              | 6422.39<br>[5147.958,<br>11692.84]             | 464.61<br>[401.25,<br>1086.70]               | 22376.81<br>[6234.66,<br>22376.81]               |
| <b>Annual loss of income</b> (mean):<br>Xiao 2022,<br>advanced<br>gastroesophageal<br>adenocarcinoma                            | --                                             |                                                 |                                               | --                                        | --                                        | --                                           | --                                             | 38892.58                                     | --                                               |
| <b>Monthly cost</b><br>(mean):<br>Leng 2019, cancer<br>patients at the<br>end-of-life                                           | 2316.87                                        |                                                 |                                               | --                                        | --                                        | --                                           | --                                             | --                                           | --                                               |
| <b>Costs incurred during the first three-phase treatment</b><br>(mean): Ren 2019,<br>children with<br>lymphoblastic<br>leukemia | --                                             |                                                 |                                               | --                                        | --                                        | 8247.51                                      | --                                             | 11182.34                                     | --                                               |
| <b>Cost during the illness</b> (mean):<br>Yun 2019, Multi-<br>cancer                                                            | intestinal:<br>6729.51;<br>lung:<br>6594.22;   |                                                 |                                               | --                                        | --                                        | --                                           | --                                             | --                                           | --                                               |

| Cost category                                                    | Total Medical costs                        |  |  | Inpatient costs | Outpatient costs | Non-medical costs | Direct costs | Indirect costs | Overall costs |
|------------------------------------------------------------------|--------------------------------------------|--|--|-----------------|------------------|-------------------|--------------|----------------|---------------|
|                                                                  | breast:<br>5227.89;<br>stomach:<br>6417.17 |  |  |                 |                  |                   |              |                |               |
| <b>Cost in 23-58 months:</b> Zhou 2020, retinoblastoma           | 18026.17                                   |  |  | --              | --               | 14053.76          | 32079.92     | 15498.14       | 47578.06      |
| <b>Cost in the five years diagnosis:</b> Zhang 2017, lung cancer | 36033.53                                   |  |  | 18589.93        | 1631.86          | 2279.80           | 38313.33     | 959.39         | 39272.72      |

<sup>a</sup>: These studies reported annual medical costs including inpatient and outpatient costs.

<sup>b</sup>: These studies reported annual medical costs including inpatient, and outpatient costs as well as the cost of self-purchasing drugs from pharmacies.

**Table S4. Annual medical costs by subgroups from a multi-center patient survey (four studies), mean US\$ (n)**

| Study                 | Huang, 2017       | Liao, 2018     | Lei, 2020      | Zhang, 2020    | Unweighted average cost [SD, range]     | Median [IQR]                  |
|-----------------------|-------------------|----------------|----------------|----------------|-----------------------------------------|-------------------------------|
| <b>Cancer</b>         | colorectal cancer | breast cancer  | liver cancer   | stomach cancer |                                         |                               |
| <b>Total</b>          | 5397.75 (2356)    | 4105.94 (2746) | 4056.78 (2223) | 5524.95 (2401) | 4771.35 [691.68]<br>[4056.78, 5524.95]  | 4751.84<br>[4093.65, 5429.55] |
| <b>Sex</b>            |                   |                |                |                |                                         |                               |
| Male                  | 5269.93 (1345)    | --             | 4098.26 (1760) | 5537.24 (1677) | 4968.48 [624.94]<br>[4098.26, 5537.24]  | 5269.93<br>[4684.10, 5403.59] |
| Female                | 5567.83 (1011)    | --             | 3896.27 (463)  | 5496.70 (724)  | 4986.93 [771.76]<br>[3896.27, 5567.83]  | 5496.70<br>[4696.48, 5532.26] |
| <b>Age</b>            |                   |                |                |                |                                         |                               |
| <45                   | 6091.26 (361)     | 4392.20 (860)  | 4968.24 (362)  | 5506.52 (310)  | 5239.55 [630.14]<br>[4392.20, 6019.26]  | 5237.38<br>[4824.23, 5652.71] |
| 45-54                 | 5697.24 (542)     | 4107.16 (1044) | 4319.19 (633)  | 5891.07 (513)  | 5003.67 [796.99]<br>[4107.16, 5891.07]  | 5008.22<br>[4266.19, 5745.70] |
| 55-64                 | 5352.88 (787)     | 3873.73 (654)  | 3849.41 (745)  | 5534.78 (902)  | 4652.70 [793.79]<br>[3849.41, 5534.78]  | 4613.31<br>[3867.65, 5398.36] |
| >=65                  | 4830.85 (666)     | 3604.67 (188)  | 3328.58 (483)  | 5239.92 (676)  | 4251.01 [803.55]<br>[3328.58, 5239.92]  | 4217.76<br>[3535.65, 4933.12] |
| <b>Clinical stage</b> |                   |                |                |                |                                         |                               |
| I                     | 4438.44 (328)     | 3566.59 (546)  | 3777.62 (299)  | 5414.38 (420)  | 4299.26 [719.68]<br>[3566.59, 5414.38]  | 4108.03<br>[3724.87, 4682.42] |
| II                    | 5306.82 (630)     | 4018.71 (1236) | 3948.31 (493)  | 5333.29 (347)  | 4651.78 [668.80]<br>[3948.31, 5333.29]  | 4662.76<br>[4001.11, 5313.44] |
| III                   | 5490.87 (815)     | 4508.91 (603)  | 4034.45 (946)  | 5760.84 (661)  | 4948.77 [704.06]<br>[4034.45, 5760.84]  | 4999.89<br>[4390.30, 5558.36] |
| IV                    | 5921.37 (559)     | 5227.64 (285)  | 4003.15 (379)  | 5430.35 (933)  | 5145.63 [706.19]<br>[4003.15, 5921.37]  | 5328.99<br>[4921.51, 5553.11] |
| <b>Insurance</b>      |                   |                |                |                |                                         |                               |
| UEBMI                 | 4333.35 (916)     | 3462.16 (1052) | 3379.42 (852)  | 4298.82 (803)  | 3868.44 [448.77]<br>[3379.42, 4333.35]  | 3880.49<br>[3441.47, 4307.46] |
| URBMI                 | 4909.42 (446)     | 3193.10 (518)  | 3747.32 (400)  | 4833.26 (404)  | 4170.77 [727.95]<br>[3193.10, 4909.42]  | 4290.29<br>[3608.76, 4852.30] |
| NCMS                  | 6504.81 (897)     | 5001.58 (1027) | 4713.41 (890)  | 6545.91 (1136) | 5691.43 [840.26]<br>[4713.41, 6545.91]  | 5753.19<br>[4929.53, 6515.09] |
| Commercial insurance  | 7938.30 (22)      | 5250.98 (46)   | 3786.80 (19)   | 7328.52 (14)   | 6076.15 [1655.15]<br>[3786.80, 7938.30] | 6289.75<br>[4884.93, 7480.96] |
| No health insurance   | 8358.03 (49)      | 6899.74 (71)   | 7468.31 (40)   | 8702.08 (30)   | 7857.04 [712.85]<br>[6899.74, 8702.08]  | 7913.17<br>[7326.17, 8444.04] |

**Table S5. Non-medical costs for cancer treatment from 12 patient surveys**

| Study      | Participant<br>s                     | Cancer<br>patients<br>(n) | Year      | Duration<br>of costs                                  | Definition in the study                                                                                                                             | Mean<br>Cost<br>(US\$) |
|------------|--------------------------------------|---------------------------|-----------|-------------------------------------------------------|-----------------------------------------------------------------------------------------------------------------------------------------------------|------------------------|
| Huang,2012 | lung cancer                          | 402                       | 2011      | annual                                                | Costs of transportation, lodging, extra nutrition products for patients, and fees for care workers.                                                 | 4977.83                |
| Li,2016    | lung cancer                          | 218                       | 2014      | annual                                                | Costs of transportation, extra nutrition products for patients, and fees for care workers.                                                          | 927.97                 |
| Huang,2017 | colorectal cancer                    | 2356                      | 2012-2014 | annual                                                | Costs of meals, additional nutrition, transportation, accommodation, fees for care workers, and other expenditures.                                 | 1024.64                |
| Liao,2018  | breast cancer                        | 2746                      | 2012-2014 | annual                                                | Costs of transportation, accommodation, meals and nutritional products, and fees for care workers.                                                  | 1043.35                |
| Lei,2020   | liver cancer                         | 2223                      | 2012-2014 | annual                                                | Costs of meals, accommodation, transportation and nutritional products, and fees for care workers.                                                  | 846.31                 |
| Sui,2020   | pediatric leukemia                   | 242                       | 2018      | annual                                                | Costs of transportation, accommodation, and nutritional products.                                                                                   | 1395.82                |
| Zhang,2020 | Stomach cancer                       | 2401                      | 2012-2014 | annual                                                | Costs of meals, accommodation, transportation and nutrition, and fees for care workers.                                                             | 985.63                 |
| Chen,2020  | esophageal cancer                    | 184                       | 2019      | annual                                                | Costs of transportation, accommodation, meals, nutrition, and other expenditures.                                                                   | 687.84                 |
| Che,2016   | liver cancer                         | 131                       | 2013      | annual                                                | Costs of transportation, nutrition supplements, and nursing worker fee.                                                                             | 106.10                 |
| Ren,2019   | children with lymphoblastic leukemia | 161                       | 2010      | costs incurred during the first three-phase treatment | Costs of accommodation, transportation, meals and nutrition, fees for hygiene cleaning products and auxiliary treatment, fees for gifts and treats. | 8247.51                |
| Zhou,2020  | retinoblastoma                       | 50                        | 2015-2017 | during the illness (23-58 months)                     | Costs of transportation, accommodation, meals, and nutrition.                                                                                       | 14053.76               |
| Zhang,2017 | lung cancer                          | 195                       | 2014      | five years                                            | Costs of transportation, accommodations, extra nutrition, and fees for care workers.                                                                | 2279.80                |

**Table S6. Medical and non-medical costs from seven studies, mean and percentage of total annual direct costs**

| Study                   | Type of cancer     | Cancer patients (n) | Year      | Location     | Duration of costs   | Medical costs |        | Non-medical costs |        | Direct costs |
|-------------------------|--------------------|---------------------|-----------|--------------|---------------------|---------------|--------|-------------------|--------|--------------|
|                         |                    |                     |           |              |                     | US\$          | %      | US\$              | %      | US\$         |
| Huang,2012 <sup>a</sup> | lung cancer        | 402                 | 2011      | East         | annual              | 7420.85       | 59.85% | 4977.83           | 40.15% | 12398.68     |
| Huang,2017              | colorectal cancer  | 2356                | 2012-2014 | Multi-center | annual <sup>b</sup> | 5397.75       | 84.05% | 1024.64           | 15.95% | 6422.39      |
| Liao,2018               | breast cancer      | 2746                | 2012-2014 | Multi-center | annual              | 4105.94       | 79.74% | 1043.34           | 20.26% | 5149.28      |
| Lei,2020                | liver cancer       | 2223                | 2012-2014 | Multi-center | annual <sup>b</sup> | 4056.78       | 82.74% | 846.31            | 17.26% | 4903.09      |
| Zhang,2020              | stomach cancer     | 2401                | 2012-2014 | Multi-center | annual <sup>b</sup> | 10297.02      | 88.06% | 1395.82           | 11.94% | 11692.84     |
| Sui,2020 <sup>a</sup>   | pediatric leukemia | 242                 | 2018      | East         | annual              | 5524.95       | 84.86% | 985.63            | 15.14% | 6510.59      |
| Chen,2020               | esophageal cancer  | 184                 | 2019      | Central      | annual              | 4460.12       | 86.64% | 687.84            | 13.36% | 5147.96      |

<sup>a</sup>: In these studies, medical costs included inpatient and outpatient costs and fees for purchasing drugs from pharmacies.

<sup>b</sup>:In these studies, costs incurred during 2 months before and 10 months after diagnosis

**Table S7. Indirect costs for cancer treatment from seven studies**

| Study                   | Participants                             | Cancer patients (n) | Year      | Duration of costs                                 | Data source                | Definition in the study                                                                                                                | Mean cost (US\$) |
|-------------------------|------------------------------------------|---------------------|-----------|---------------------------------------------------|----------------------------|----------------------------------------------------------------------------------------------------------------------------------------|------------------|
| Huang,2012 <sup>a</sup> | lung cancer                              | 402                 | 2011      | annual                                            | survey                     | Income loss of both patients and their family due to illness and financial loss due to seeking non-medical support for the illness.    | 9978.13          |
| Zhao,2016               | cancers                                  | 318                 | 2014      | annual                                            | survey                     | No definition                                                                                                                          | 490.31           |
| Chen,2020 <sup>a</sup>  | esophageal cancer                        | 184                 | 2019      | annual                                            | survey                     | Cost of productivity loss of patients and their family caregivers due to illness.                                                      | 1086.70          |
| Xiao,2022               | advanced gastroesophageal adenocarcinoma | 66                  | 2019      | annual                                            | survey                     | Income loss of patients due to illness.                                                                                                | 38892.58         |
| Ren,2019                | children with lymphoblastic leukemia     | 161                 | 2010      | costs incurred on the first three-phase treatment | survey                     | Costs of productivity loss of children's parents due to taking care of ill kids (human capital approach).                              | 11182.35         |
| Zhang,2017 <sup>a</sup> | lung cancer                              | 195                 | 2014      | five years                                        | survey                     | Income loss of both patients and their family caregivers resulting from outpatient visits and hospitalization (human capital approach) | 959.39           |
| Zhou,2020 <sup>#</sup>  | retinoblastoma                           | 50                  | 2015-2017 | during the illness (23-58 months)                 | survey and medical records | Income loss caused by the loss of working hours of the accompanying parents.                                                           | 15498.14         |

<sup>a</sup>: These studies reported both direct cost and indirect costs.

**Table S8. Annual direct cost as a percentage of annual household income from six studies and meta-proportion of five studies, %**

| Study                                                                                                         | Participants      | Cancer patients (n) | Year      | Duration of costs   | Annual direct costs (US\$) | Annual household income (US\$) | Ratio          |
|---------------------------------------------------------------------------------------------------------------|-------------------|---------------------|-----------|---------------------|----------------------------|--------------------------------|----------------|
| Huang,2012 <sup>a</sup>                                                                                       | lung cancer       | 402                 | 2011      | annual              | 12398.68                   | 13550.73                       | 91.50%         |
| Huang,2017                                                                                                    | colorectal cancer | 2356                | 2012-2014 | annual <sup>b</sup> | 6422.387                   | 10013.99                       | 64.13%         |
| Liao,2018                                                                                                     | breast cancer     | 2746                | 2012-2014 | annual              | 5149.28                    | 10990.09                       | 46.85%         |
| Lei,2020                                                                                                      | liver caner       | 2223                | 2012-2014 | annual <sup>b</sup> | 4903.091                   | 11259.7                        | 43.55%         |
| Zhang,2020                                                                                                    | Stomach cancer    | 2401                | 2012-2014 | annual <sup>b</sup> | 6510.585                   | 9481.498                       | 68.67%         |
| Chen,2020 <sup>c</sup>                                                                                        | esophageal cancer | 184                 | 2019      | annual              | 5147.957                   | 3454.453                       | 149.02%        |
| Random Pooled ES (95%CI) of the proportion of annual direct cost to annual household income from five studies |                   |                     |           |                     |                            |                                | 64% [44%, 82%] |

<sup>a</sup>:In these studies, medical costs included inpatient and outpatient costs and fees for purchasing drugs from pharmacies.

<sup>b</sup>:In these studies, costs incurred during 2 months before and 10 months after diagnosis.

<sup>c</sup>: This study was not included in the meta-proportion analysis.

**Table S9. Catastrophic health expenditure (CHE) incurred by cancer care from nine studies**

| Study                   | Participants                       | Cancer patients (n)  | Year       | Location       | Definition of CHE                                                                                          | CHE rates                    |
|-------------------------|------------------------------------|----------------------|------------|----------------|------------------------------------------------------------------------------------------------------------|------------------------------|
| Zhao,2021               | cancer patients                    | 2011:234<br>2015:368 | 2011, 2015 | National level | Annual medical cost more than 40% households' non-food expenditures                                        | 2011: 25.12%<br>2015: 27.15% |
| Sun,2021                | breast cancer                      | 639                  | 2015-2016  | multi-center   |                                                                                                            | 66.82%                       |
| Sun,2021 <sup>a</sup>   | lung cancer                        | 2565                 | 2015-2016  | multi-center   |                                                                                                            | 78.1%                        |
| Huang,2021 <sup>a</sup> | cancer                             | 332                  | 2015-2016  | Guangxi        |                                                                                                            | 61.14%                       |
| Sui,2020                | pediatric leukemia                 | 242                  | 2018       | Heilongjiang   |                                                                                                            | 43.4%                        |
| Che,2016                | liver cancer                       | 131                  | 2013       | Yunnan         | Annual direct cost (including medical cost and non-medical cost) more than 40% annual households' income   | 49.6%                        |
| Chen,2018               | lung cancer                        | 227                  | 2016       | Shanghai       |                                                                                                            | 72.70%                       |
| Leng,2019               | cancer patients at the end-of-life | 792                  | 2013-2016  | multi-center   | Monthly direct cost (including medical cost and non-medical cost) more than 40% monthly households' income | Rural: 96.1%<br>Urban: 94.3% |
| Zhao,2016               | cancer                             | 318                  | 2014       | Anhui          | Annual inpatient cost more than 40% of annual household income                                             | 20.6%                        |

<sup>a</sup> In these studies, costs incurred during 2 months before and 10 months after diagnosis.

Zhao, 2022: Data from a population-based survey, only approximately half of the cancer patients utilized treatment.

Chen,2018: Cost-income ratio was reported by the participants.
